# Supplementary material for: Neoadjuvant therapy with immune checkpoint blockade, antiangiogenesis, and chemotherapy for locally advanced gastric cancer
Source: PubMed Central journal article supplement (PMC9810618; doi:10.1038/s41467-022-35431-x), 2023-01-03
Supplement: 41467_2022_35431_MOESM1_ESM.pdf [file 41467_2022_35431_MOESM1_ESM.pdf]

## Supplementary information

### Supplementary Figures 1-16

**Supplementary Figure 1.** CONSORT diagram.

**Supplementary Figure 2.** Multiplex immunofluorescence staining of patients P10 and P20 who received non-MPR.

**Supplementary Figure 3.** Adverse events of patients undergoing neoadjuvant treatment.

**Supplementary Figure 4.** Postoperative complications of patients.

**Supplementary Figure 5.** Genomic changes during neoadjuvant therapy.

**Supplementary Figure 6.** VAF values of nonsynonymous mutations in pre- and post-treatment samples.

**Supplementary Figure 7.** Dynamic changes in cellular frequencies (CCF) of nonsynonymous mutations from pre- to post-neoadjuvant treatment.

**Supplementary Figure 8.** Differentially expressed genes and functional enrichments.

**Supplementary Figure 9.** Baseline levels of immune-related genes between PPR+ and non-PPR+ groups.

**Supplementary Figure 10.** Changes in immune-related gene expression.

**Supplementary Figure 11.** Baseline levels of immune-related signatures between PPR+ and non-PPR+ groups.

**Supplementary Figure 12.** Changes in immune-related signatures.

**Supplementary Figure 13.** Changes in proportions of immune-related cells in PPR+ (A) and non-PPR+ patients (B), estimated by xCell.

**Supplementary Figure 14.** Immunophenotypes of paired specimens.

**Supplementary Figure 15.** TCR repertoire overlaps across samples.

**Supplementary Figure 16.** Dynamic changes in D50 (A), Shannon (B), and evenness (C) index from pre- to post-treatment samples.

### Supplementary Tables 1-3

**Supplementary Table 1.** Baseline characteristics of patients and treatment medicines.

**Supplementary Table 2.** TCR characteristics.

**Supplementary Table 3.** Predictive values of putative biomarkers.

**SUPPLEMENTARY FIGURES**

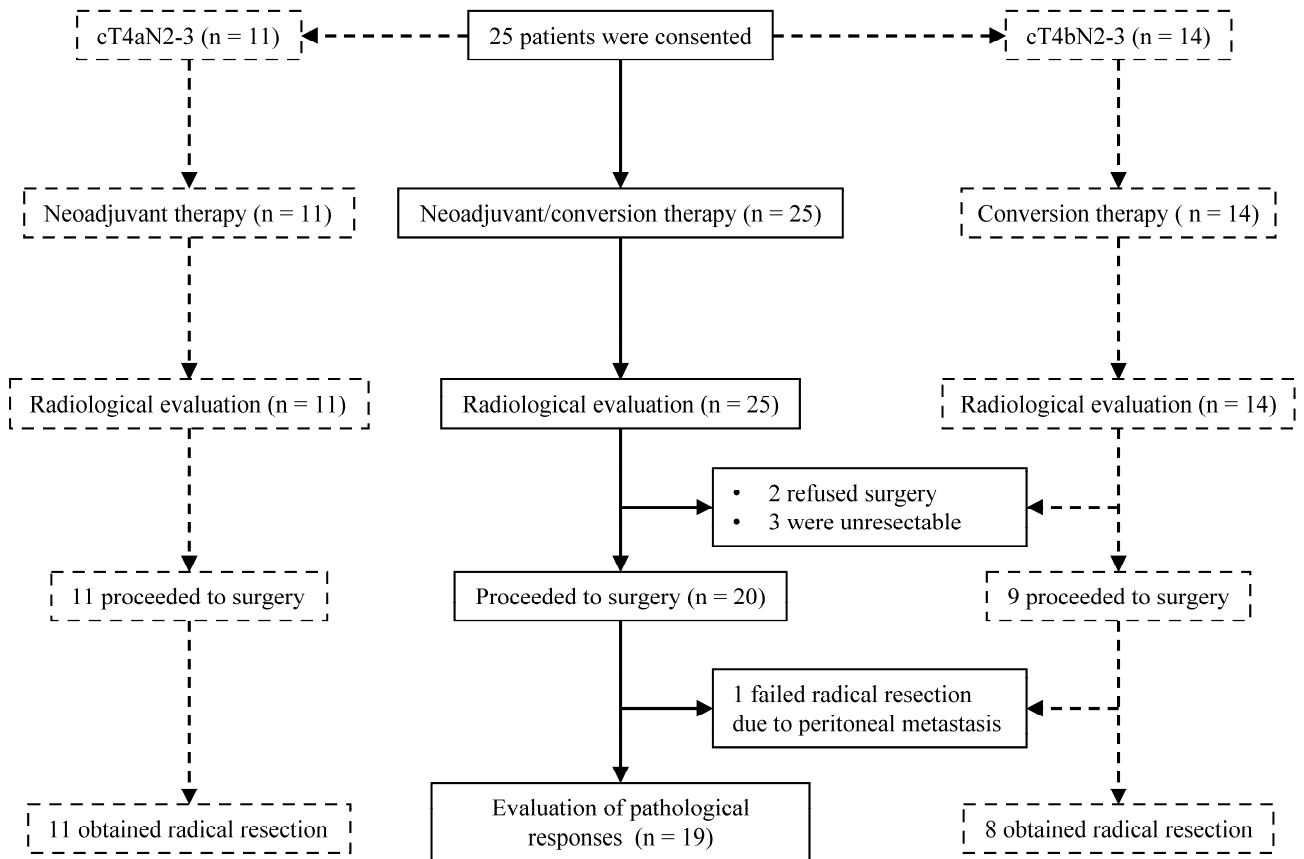

**Supplementary Figure 1. CONSORT diagram.** The diagram shows the progress through this trial. Solid lines indicate all recruited patients, and dotted lines indicate cT4a and cT4b patients separately.

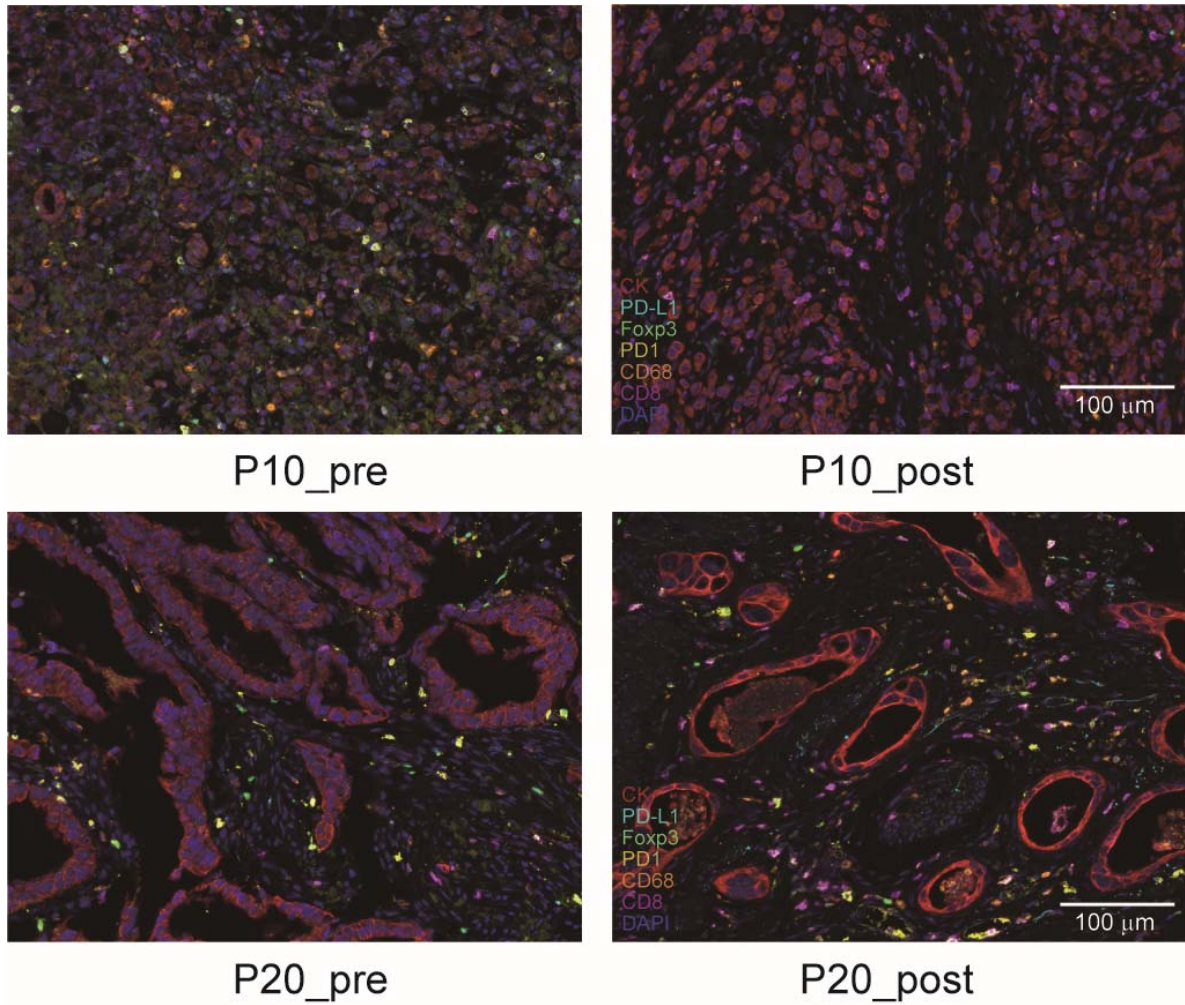

**Supplementary Figure 2. Multiplex immunofluorescence staining of patients P10 and P20 who received non-MPR.** Visible structures include cytokeratin-positive tumor cells (red), PD-L1+ cells (cyan), FoxP3+ regulatory T cells (green), PD-1+ cells (yellow), CD68+ macrophages (orange), CD8+ T cells (magenta), and nuclei (blue).

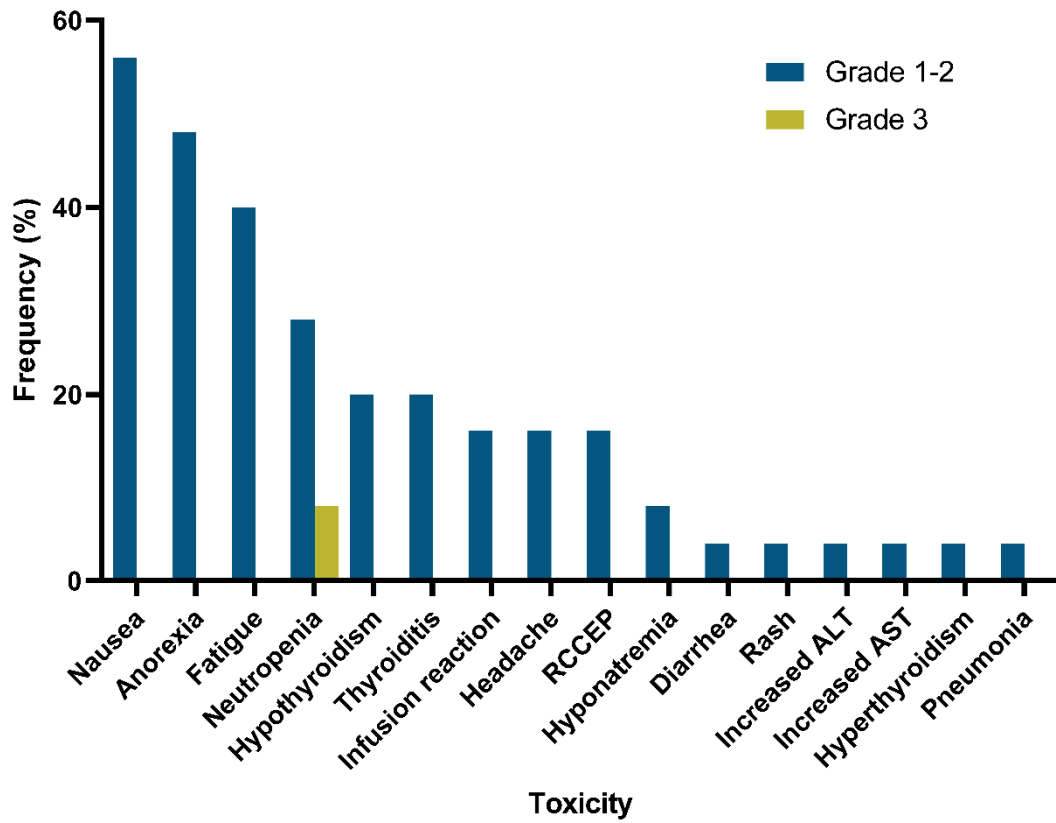

**Supplementary Figure 3. Adverse events of patients undergoing neoadjuvant treatment (n = 25).**

No grade 4-5 toxicity occurred. RCCEP, reactive cutaneous capillary endothelial proliferation.

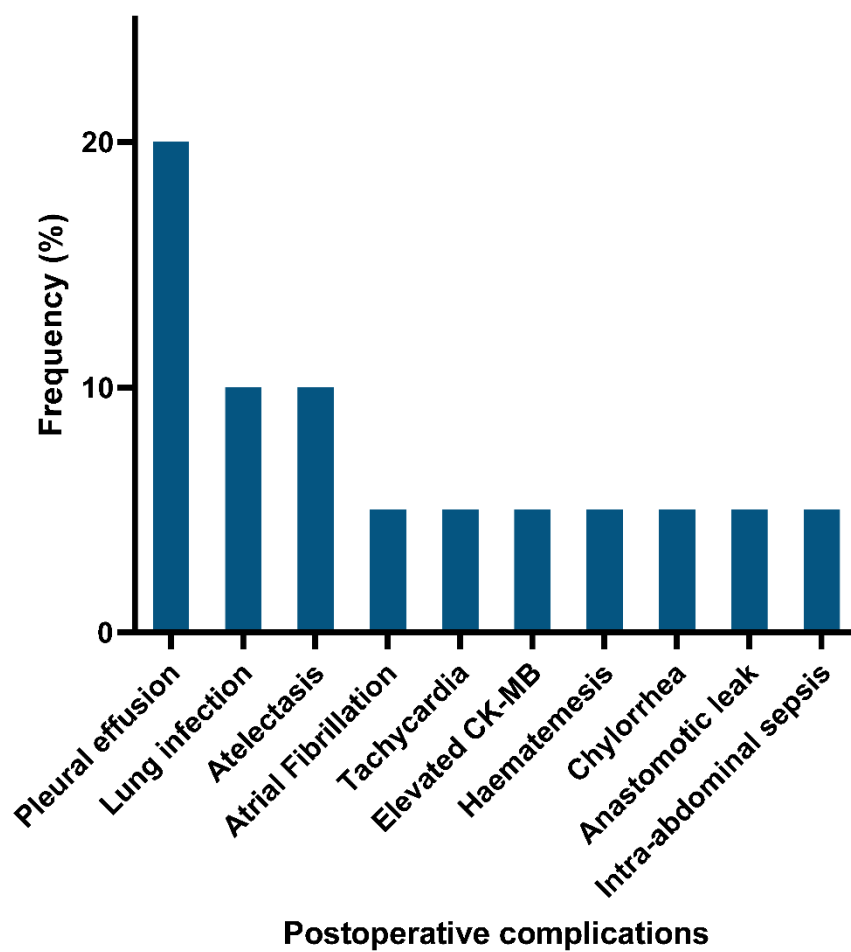

**Supplementary Figure 4. Postoperative complications of patients (n = 20).** All complications were grade 1-2, and no grade 3-5 complications occurred, according to the Clavien-Dindo classification.

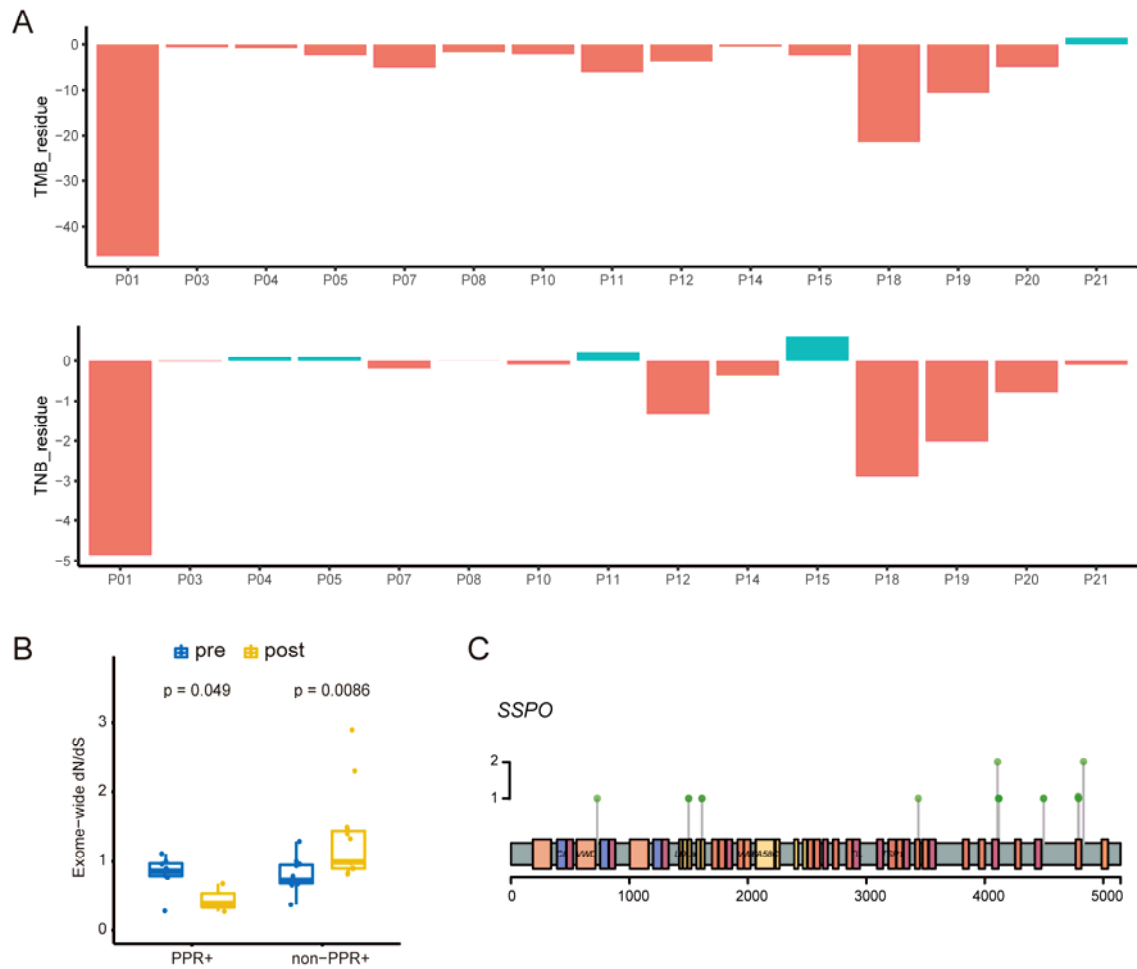

**Supplementary Figure 5. Genomic changes during neoadjuvant therapy. A** Changes in TMB and TNB indices after treatment in all patients ( $n = 15$ ). **B** Differences in relative rates of nonsynonymous and synonymous mutations (dN/dS) between pre- and post-treatment samples in PPR+ ( $n = 8$  and 3) and non-PPR+ ( $n = 11$  and 11) patients. Wilcoxon rank-sum test was used for comparison. **C** Distribution of mutations in the SSPO gene.

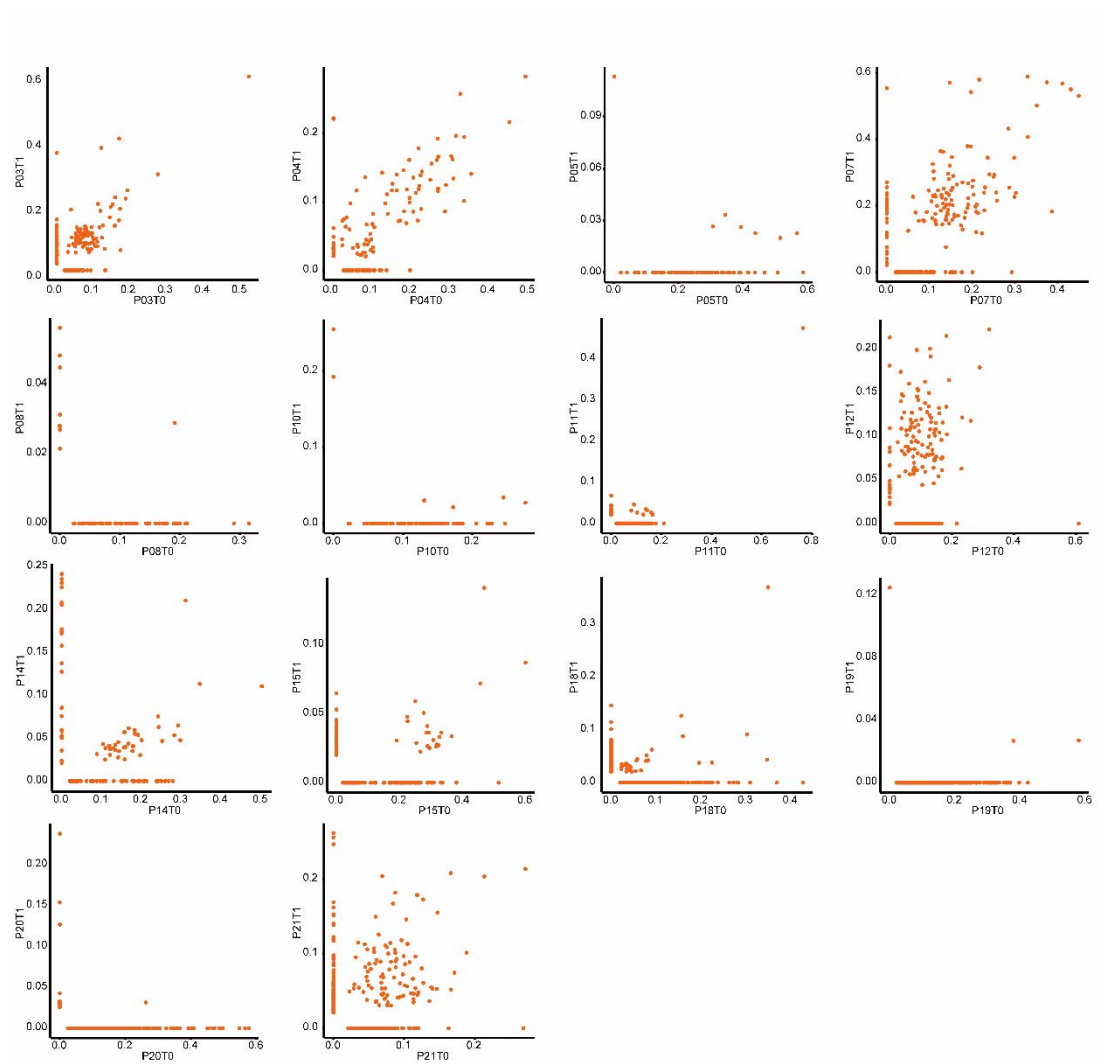

**Supplementary Figure 6. VAF values of nonsynonymous mutations in pre- and post-treatment samples (n = 14).**

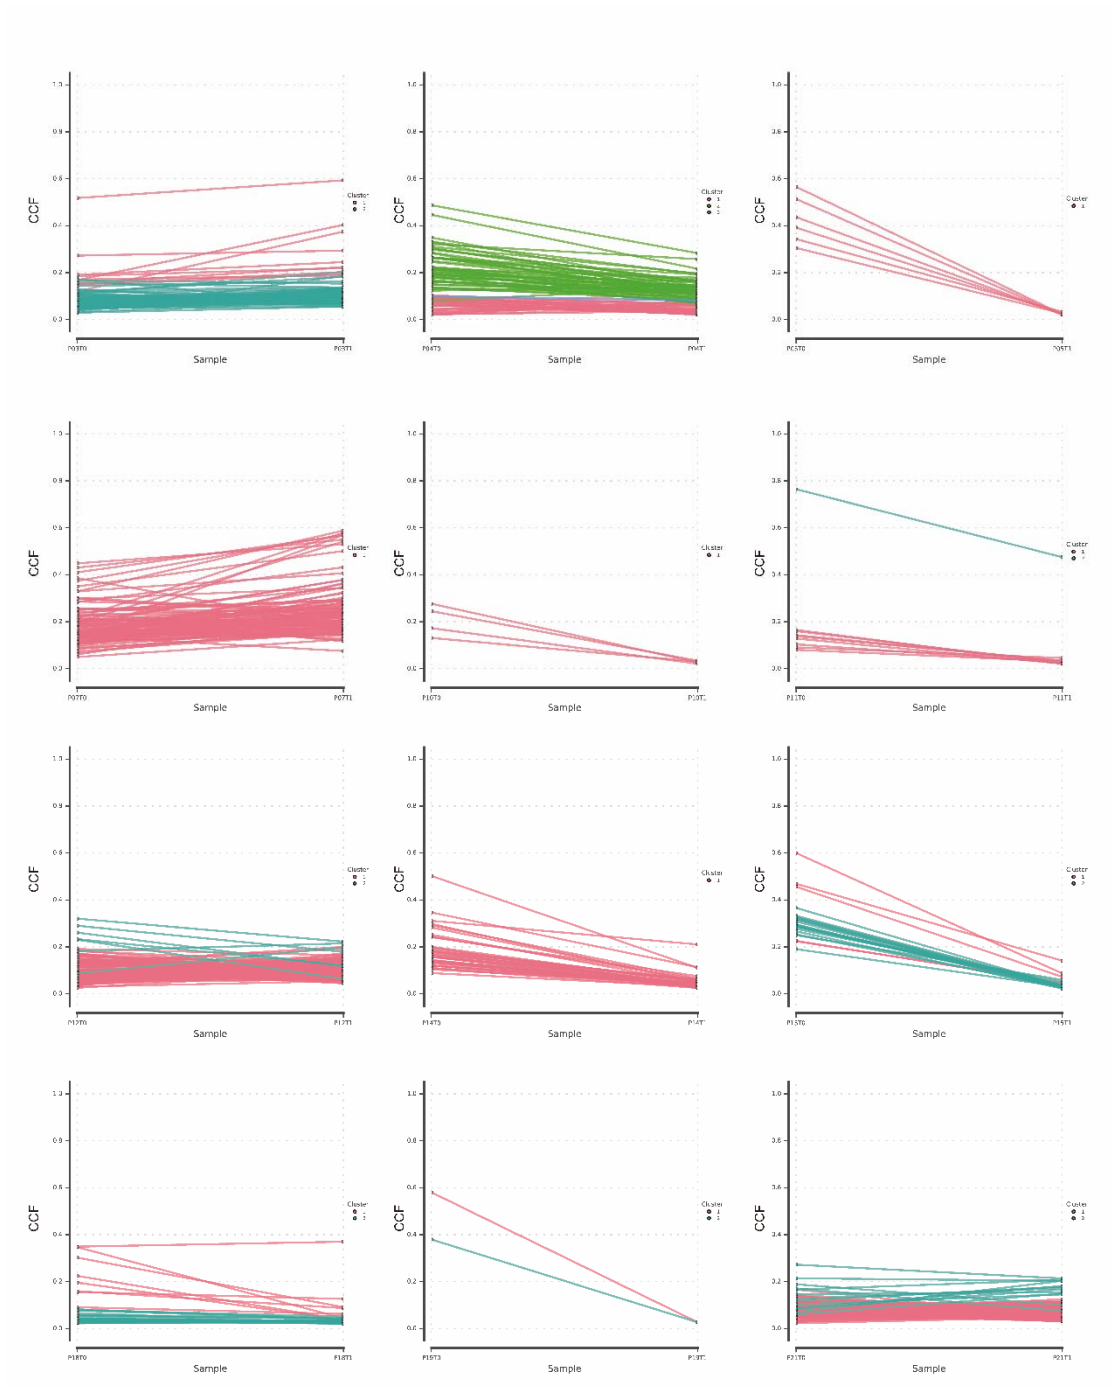

**Supplementary Figure 7. Dynamic changes in cellular frequencies (CCF) of nonsynonymous mutations from pre- to post-neoadjuvant treatment (n = 12).**



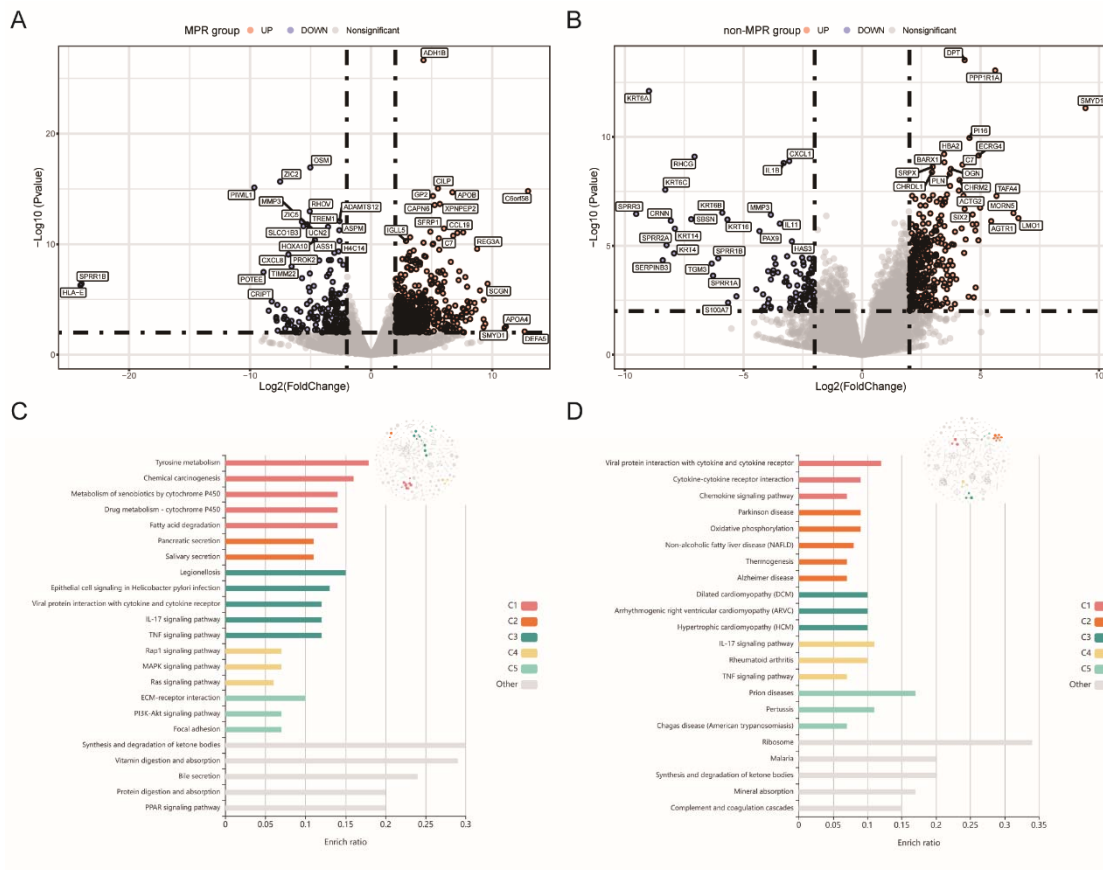

**Supplementary Figure 8. Differentially expressed genes and functional enrichments.** **A** Volcano plot showing the differentially expressed genes between pre- (n = 2) and post-treatment (n = 2) samples in the MPR group. **B** Volcano plot showing the differentially expressed genes between pre- (n = 10) and post-treatment (n = 12) in the non-MPR group. Color dots denote genes passing the P-value and fold change thresholds in A-B. **C** Functional pathway enrichment by differentially expressed genes in the MPR group. **D** Functional pathway enrichment by differentially expressed genes in the non-MPR group. Similar pathways are clustered and shown in different colors in C-D.

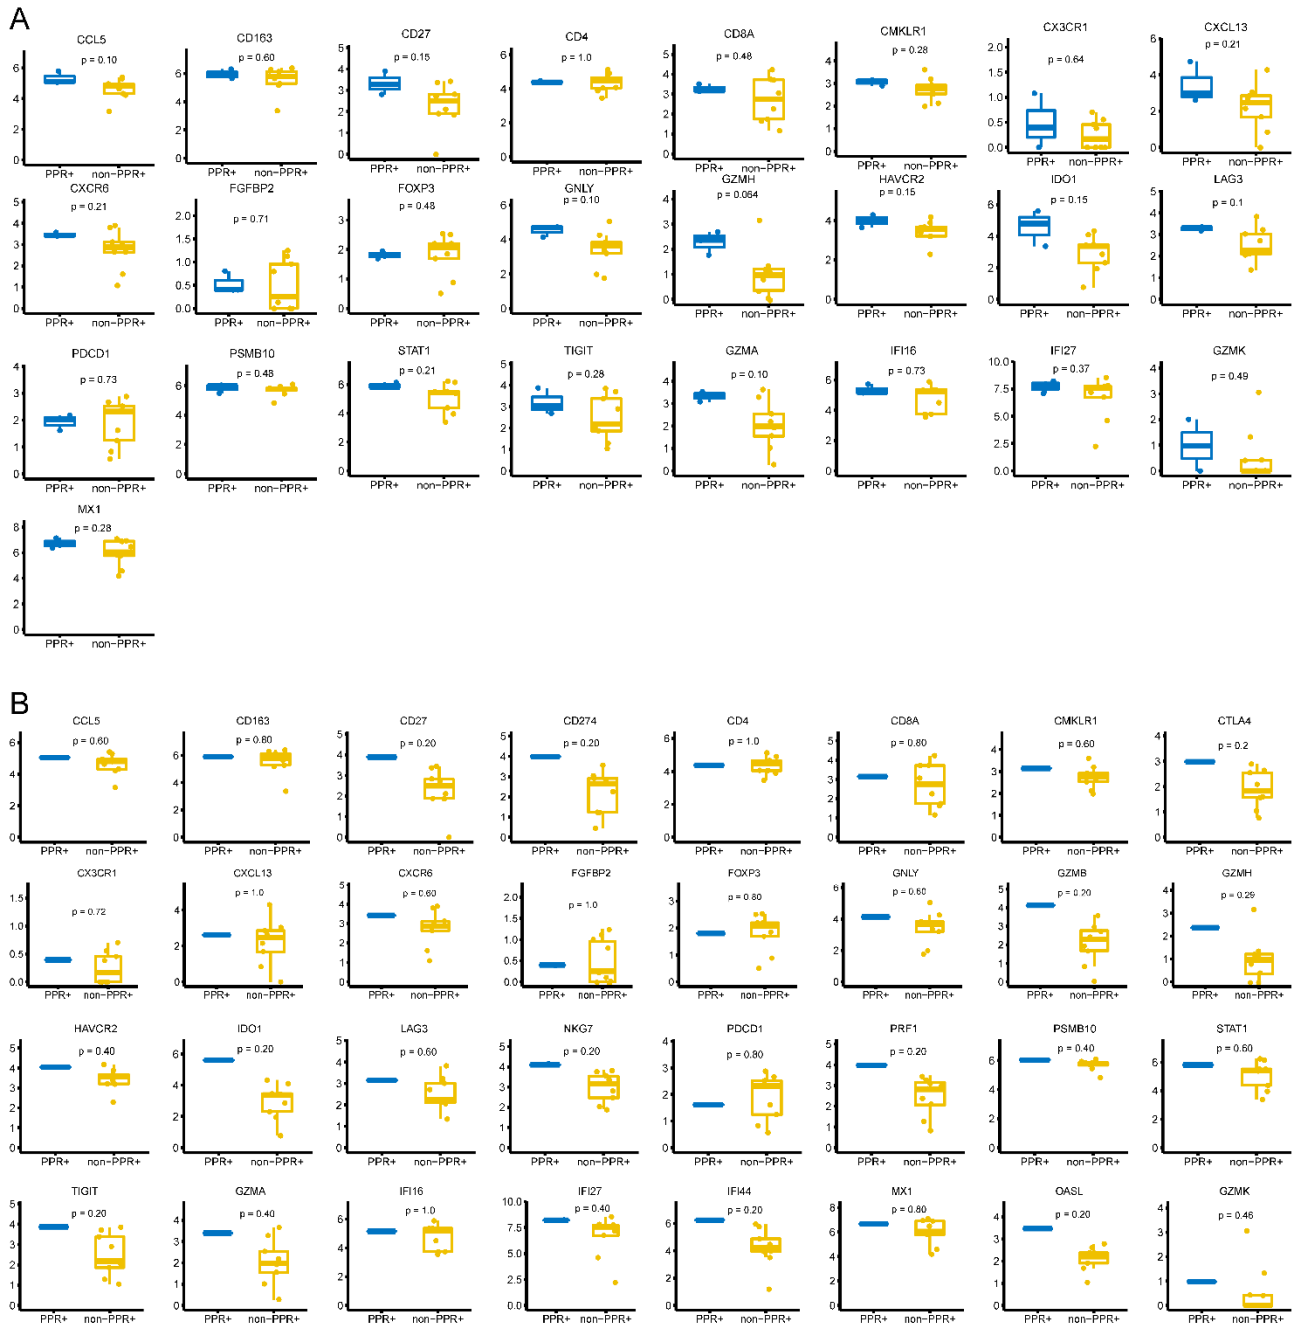

**Supplementary Figure 9. Baseline levels of immune-related genes between PPR+ and non-PPR+ groups. A.** Differences in baseline immune-related gene levels between PPR+ (n = 3) and non-PPR+ (n = 9) groups. **B.** Differences in baseline immune-related gene levels between PPR+ (n = 1) and non-PPR+ (n = 9) groups in MSI-H-excluded population. Boxplots represent median, 25th, and 75th percentiles. Wilcoxon rank-sum test was used for comparison in **A** and **B**.

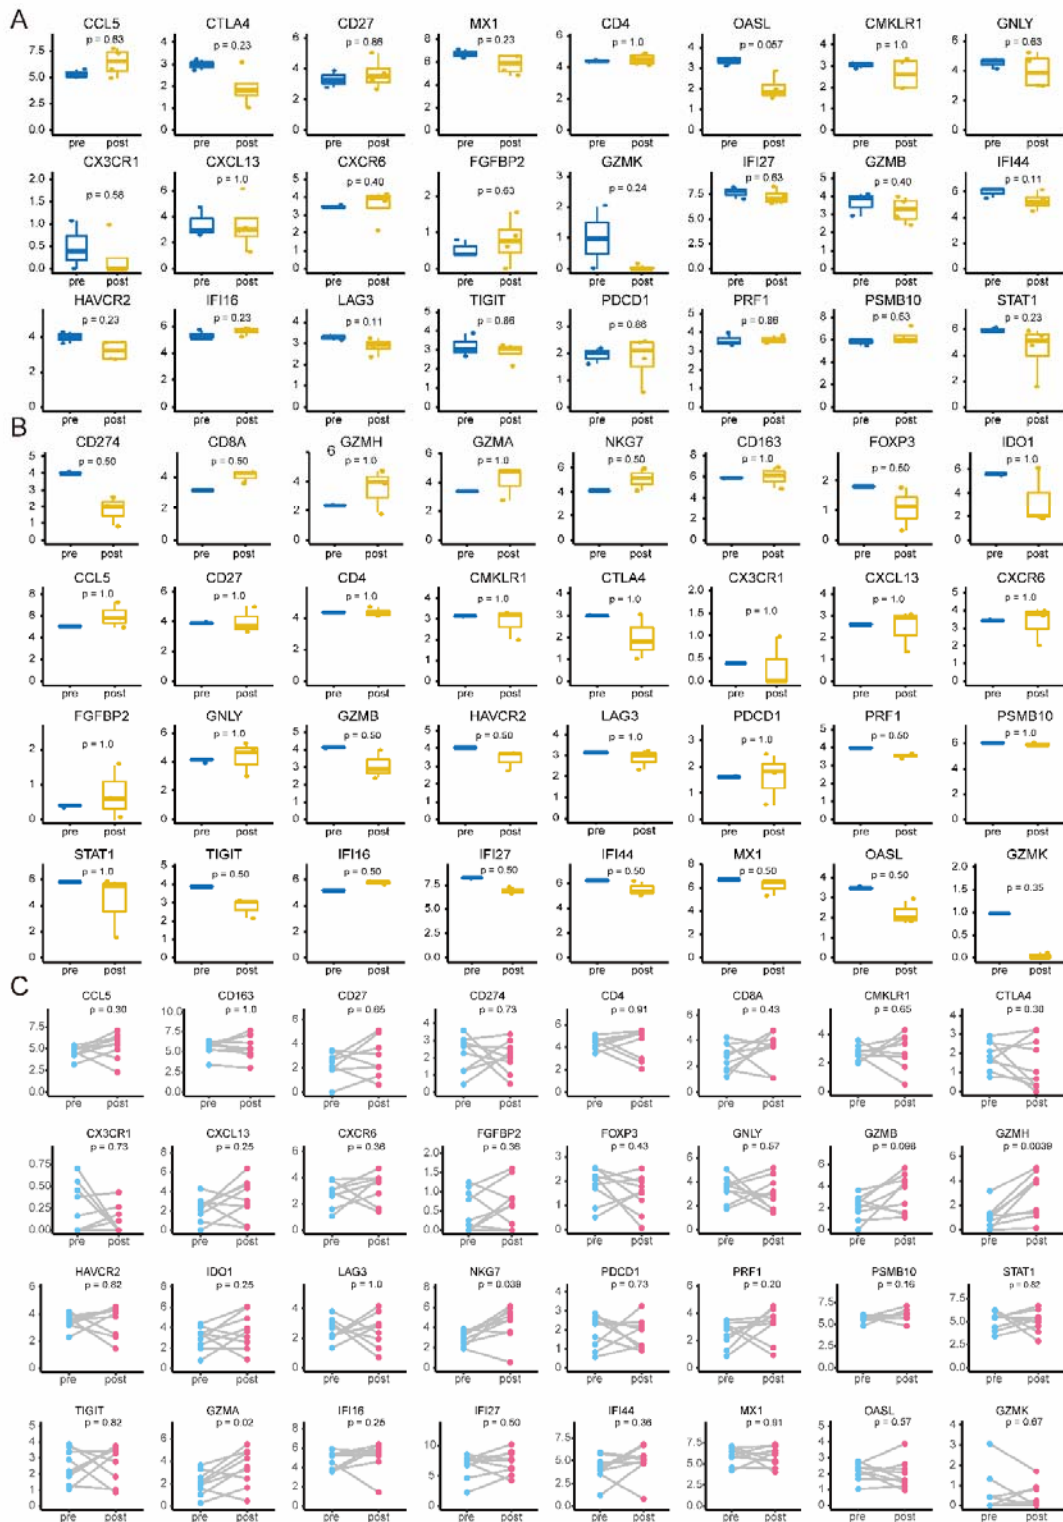

**Supplementary Figure 10. Changes in immune-related gene expression.** **A** Differences in immune-related gene levels between pre- (n = 3) and post-treatment (n = 4) samples in the PPR+ group. **B** Differences in immune-related gene levels between pre- (n = 1) and post-treatment (n = 3) samples in the PPR+ group with MSS. Wilcoxon rank-sum test was used for comparison in **A** and **B**. **C** Differences in immune-related gene levels between pre- and post-treatment samples in the non-PPR+ group (n = 9). Wilcoxon signed-rank test was used. Boxplots represent median, 25th, and 75th percentiles.

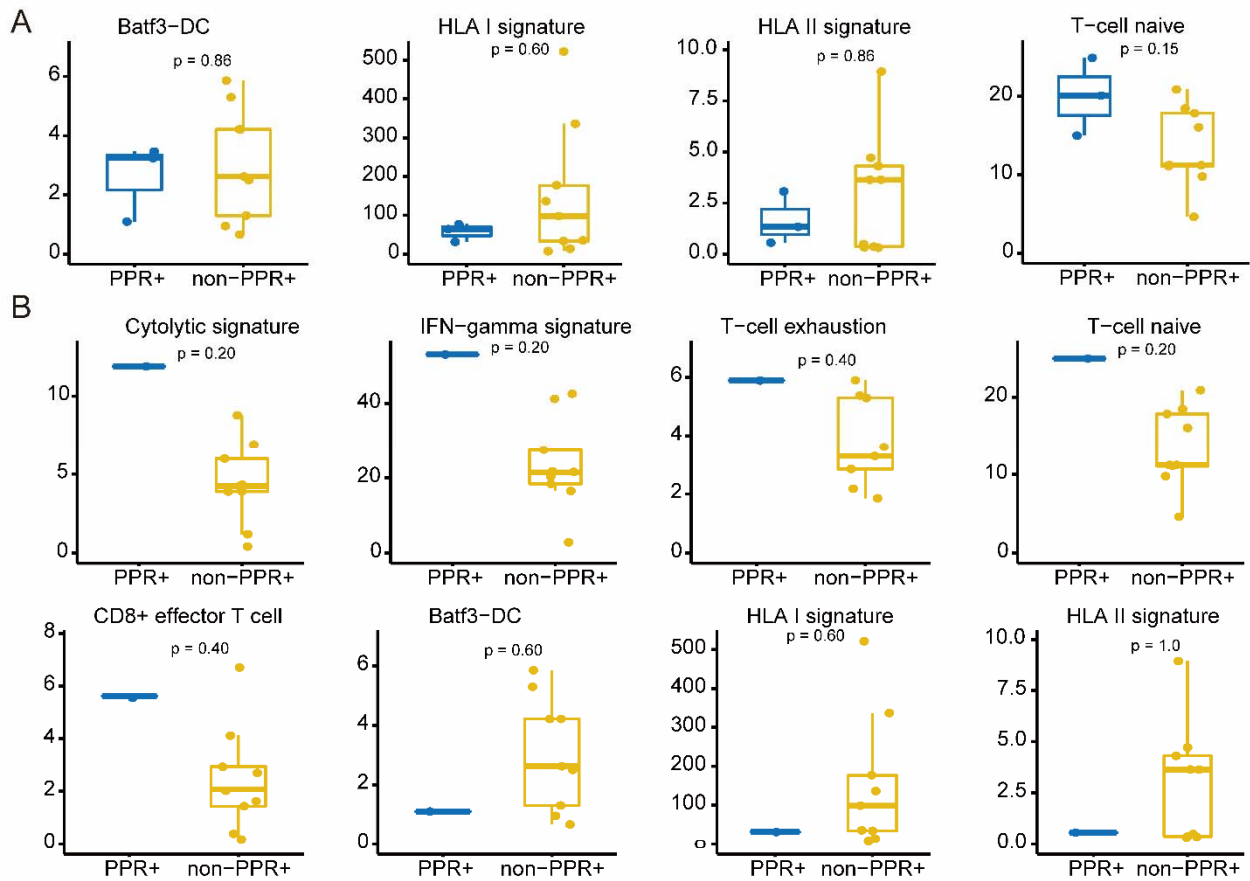

**Supplementary Figure 11. Baseline levels of immune-related signatures between PPR+ and non-PPR+ groups. A.** Differences in baseline immune-related signatures between PPR+ ( $n = 3$ ) and non-PPR+ ( $n = 9$ ) groups. **B.** Differences in baseline immune-related signatures between PPR+ ( $n = 1$ ) and non-PPR+ ( $n = 9$ ) groups in MSI-H-excluded population. Wilcoxon rank-sum test was used for comparison in **A** and **B**.

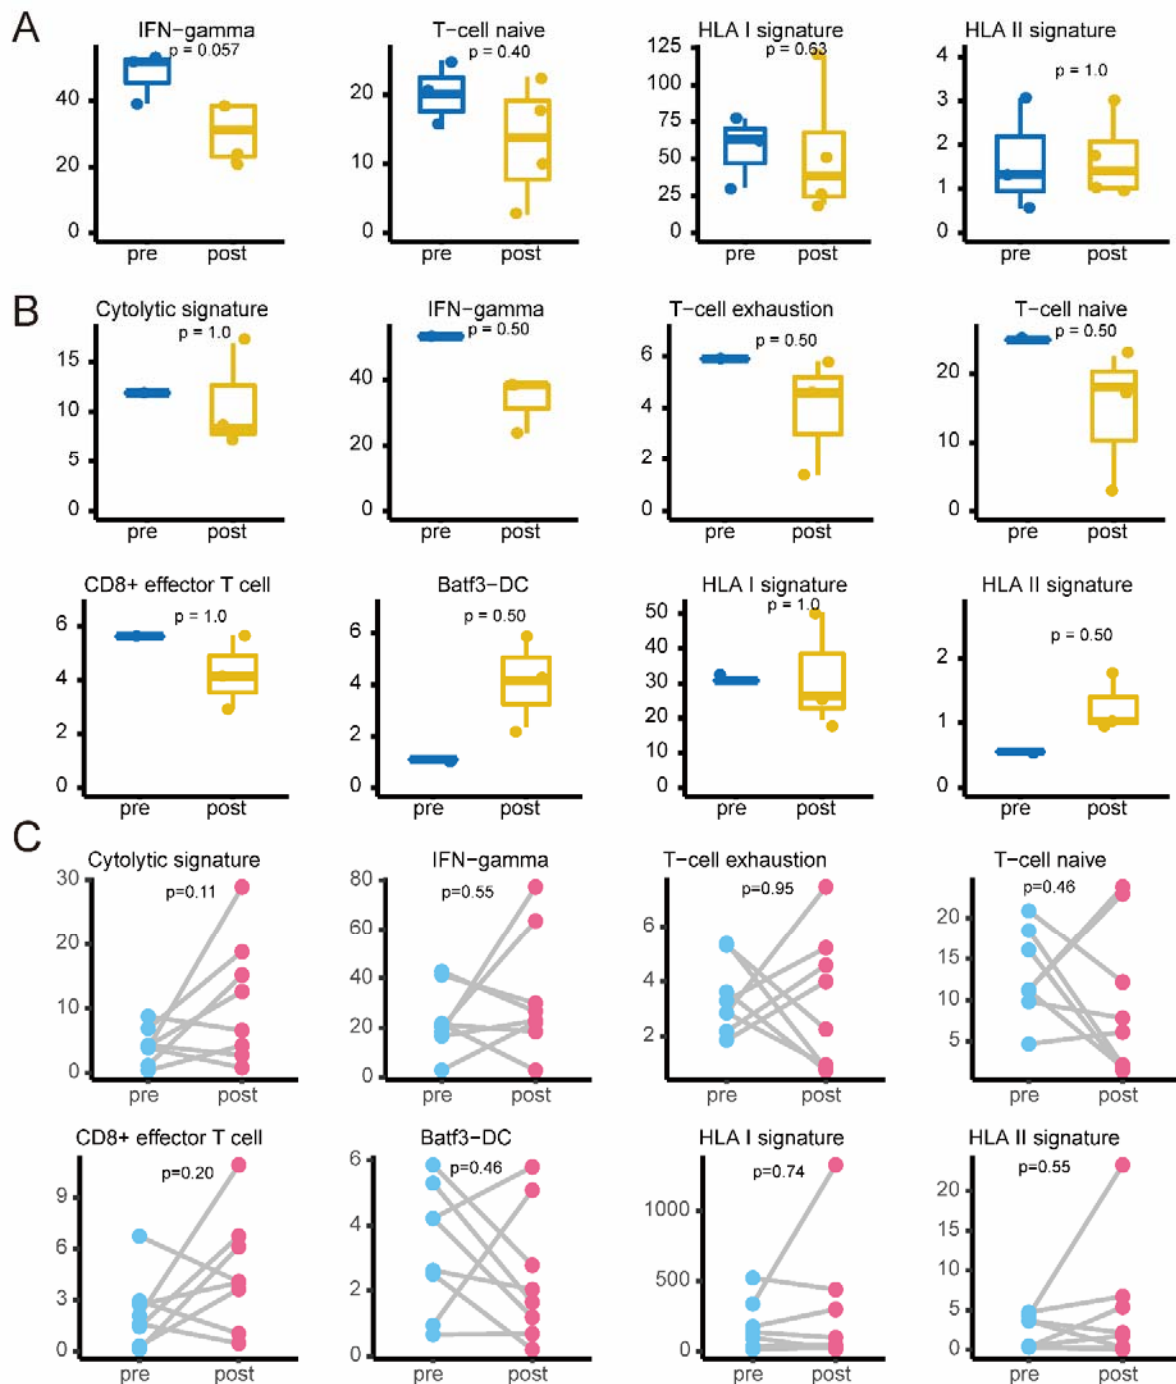

**Supplementary Figure 12. Changes in immune-related signatures.** **A** Differences in immune-related signatures between pre- ( $n = 3$ ) and post-treatment samples in PPR+ ( $n = 4$ ) patients. **B** Differences in immune-related signatures between pre- ( $n = 1$ ) and post-treatment ( $n = 3$ ) samples in PPR+ patients with MSS. Wilcoxon rank-sum test was used for comparison in **A** and **B**. Boxes represent median, 25th, and 75th percentiles in **A** and **B**. **C** Differences in immune-related signatures between pre- and post-treatment samples in non-PPR+ patients ( $n = 9$ ). Wilcoxon signed-rank test was used.

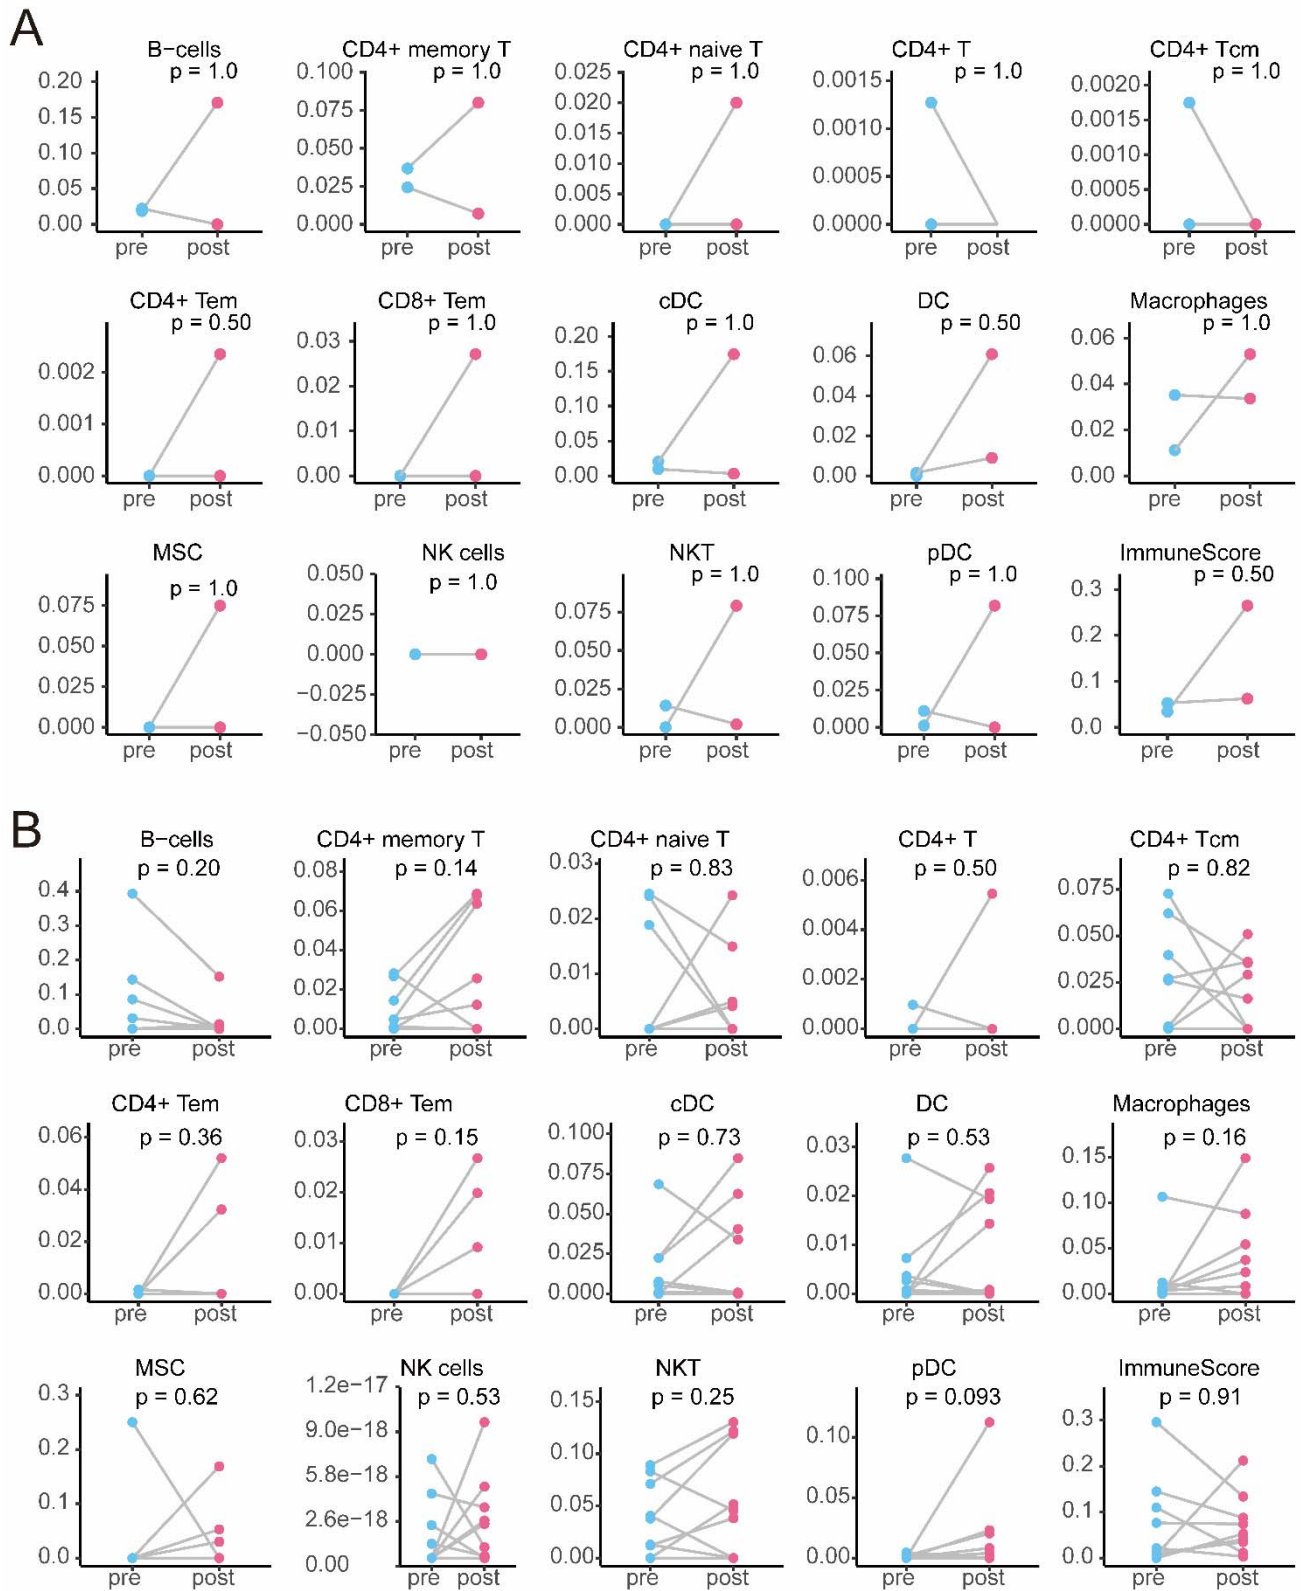

**Supplementary Figure 13. Changes in proportions of immune-related cells in PPR+ (A, n = 2) and non-PPR+ patients (B, n = 9), estimated by xCell. Wilcoxon signed-rank test was used for comparison in A and B.**



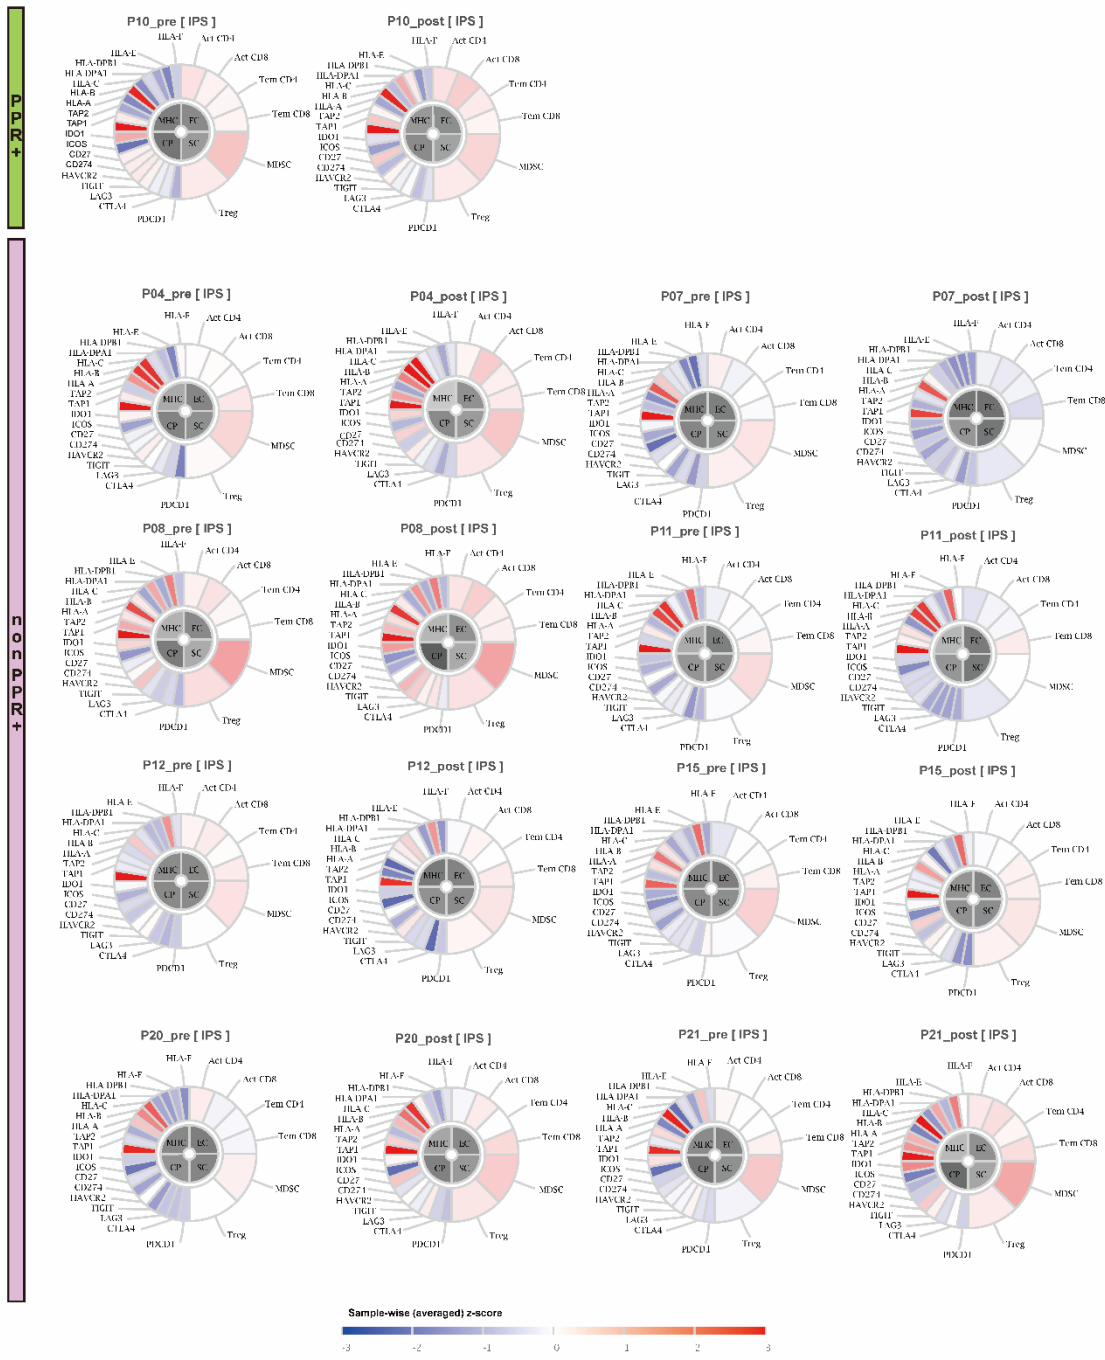

**Supplementary Figure 14. Immunophenotypes of paired specimens.** The major determinants are involved in four categories: MHC molecules (MHC), immunomodulators (CP), effector cells (EC), and suppressor cells (SC). n= 9.

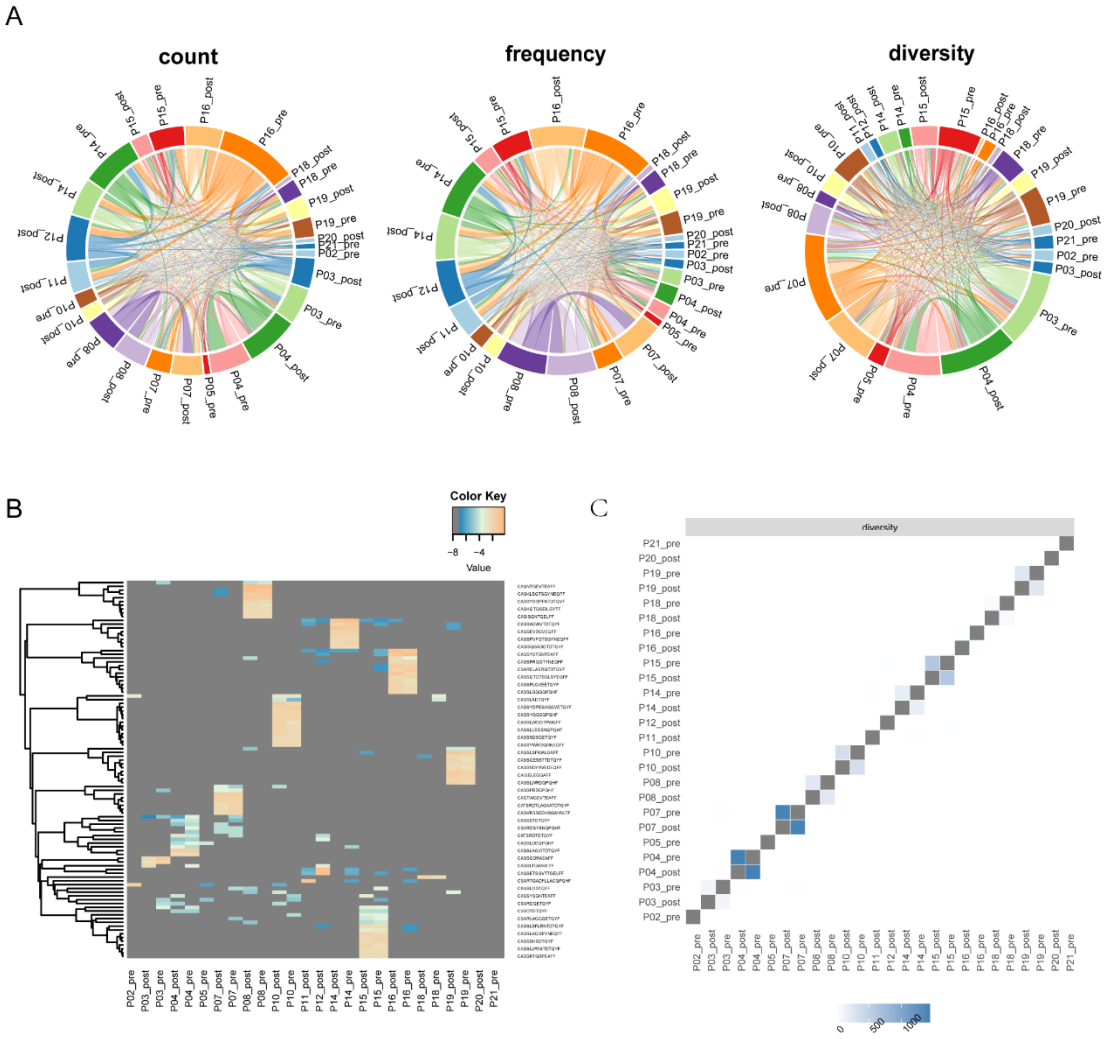

**Supplementary Figure 15. TCR repertoire overlaps across samples in 16 patients. A** Pairwise overlap circos plots showing counts (left) and frequencies (right) that are shared between samples. **B** Heatmap illustrating abundance of the top TCR clonotypes. **C** Heatmap illustrating correlation with diversity across samples.



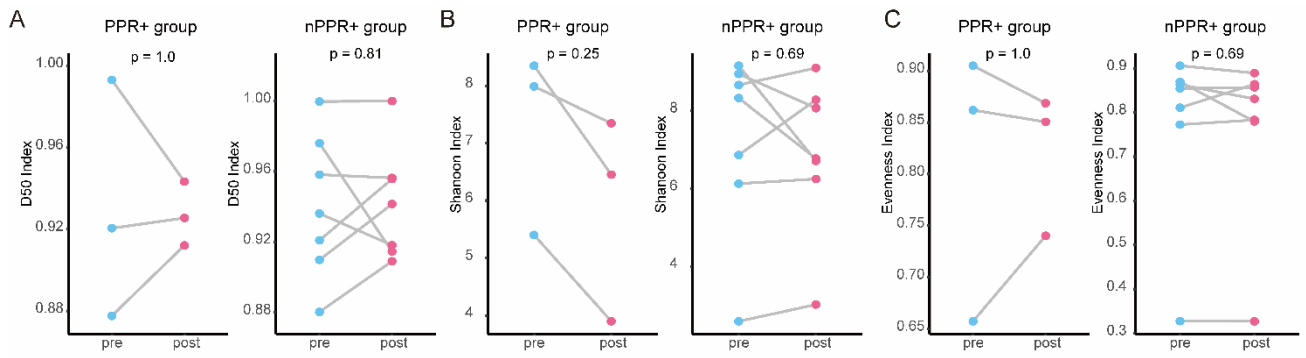

**Supplementary Figure 16. Dynamic changes in D50 (A), Shannon (B), and evenness (C) indices from pre- to post-treatment samples. Boxplots represent median, 25th, and 75th percentiles. Wilcoxon signed-rank test was used.**

## SUPPLEMENTARY TABLES

**Supplementary Table 1.** Baseline characteristics of patients and treatment medicines.

| Patient | ECOG | T stage | MSI   | PD-L1 CPS | Treatment*      | Cycles |
|---------|------|---------|-------|-----------|-----------------|--------|
| P01     | 1    | cT4a    | MSI-H | 0         | cam+apa+S-1     | 2      |
| P02     | 1    | cT4a    | MSI-H | 60        | cam+apa+S-1     | 2      |
| P03     | 0    | cT4a    | MSS   | 0         | cam+apa+S-1     | 2      |
| P04     | 0    | cT4b    | MSS   | 0         | cam+apa+S-1     | 2      |
| P05     | 0    | cT4b    | MSS   | NA        | cam+apa+S-1     | 2      |
| P06     | 1    | cT4b    | MSS   | 0         | cam+apa+S-1     | 2      |
| P07     | 0    | cT4b    | MSS   | 0         | cam+apa+S-1     | 2      |
| P08     | 0    | cT4a    | MSS   | 0         | cam+apa+S-1     | 2      |
| P09     | 1    | cT4b    | MSS   | 0         | cam+apa+S-1     | 4      |
| P10     | 0    | cT4a    | MSS   | 0         | cam+apa+S-1     | 2      |
| P11     | 0    | cT4a    | MSS   | 0         | cam+apa+S-1     | 2      |
| P12     | 1    | cT4a    | MSS   | 0         | cam+apa+S-1     | 2      |
| P13     | 0    | cT4b    | MSS   | 0         | cam+apa+S-1     | 2      |
| P14     | 0    | cT4a    | MSS   | 0         | cam+apa+S-1+oxa | 2      |
| P15     | 0    | cT4a    | MSS   | 0         | cam+apa+S-1+oxa | 2      |
| P16     | 0    | cT4a    | MSS   | 2         | cam+apa+S-1+oxa | 2      |
| P17     | 1    | cT4b    | MSS   | 0         | cam+apa+S-1+oxa | 4      |
| P18     | 1    | cT4a    | MSS   | 0         | cam+apa+S-1+oxa | 2      |
| P19     | 0    | cT4b    | MSS   | 0         | cam+apa+S-1+oxa | 2      |
| P20     | 1    | cT4b    | MSS   | 0         | cam+apa+S-1+oxa | 6      |
| P21     | 1    | cT4b    | MSS   | 0         | cam+apa+S-1+oxa | 2      |
| P22     | 0    | cT4b    | MSI-H | 5         | cam+apa+S-1+oxa | 2      |
| P23     | 0    | cT4b    | MSI-H | 0         | cam+apa+S-1+oxa | 2      |
| P24     | 1    | cT4b    | MSS   | 0         | cam+apa+S-1+oxa | 4      |
| P25     | 1    | cT4b    | MSS   | 0         | cam+apa+S-1+oxa | 6      |

ECOG = Eastern Cooperative Oncology Group, MSI = microsatellite instability, MSI-H = MSI high, MSS = MSI stable, cam = camrelizumab, apa = apatinib, oxa = oxaliplatin.

\* Treatment doses: camrelizumab: 200 mg d1; apatinib: 250 mg qd d1-14; S-1: 50 mg bid d1-10; oxaliplatin: 85 mg/m<sup>2</sup> d1.

**Supplementary Table 2.** TCR characteristics.

| Sample Id | Count    | Diversity | Mean cdr3nt length | Mean insert size | Mean ndn size | Convergence | d50 Index | Shannon index | Evenness |
|-----------|----------|-----------|--------------------|------------------|---------------|-------------|-----------|---------------|----------|
| P02_pre   | 3806000  | 4286      | 43.56              | 4.55             | 12.34         | 1.03        | 0.92      | 7.23          | 0.86     |
| P03_post  | 20416252 | 3231      | 42.97              | 4.16             | 11.85         | 1.03        | 0.94      | 6.71          | 0.83     |
| P03_pre   | 21876383 | 40589     | 42.62              | 4.09             | 11.6          | 1.04        | 0.91      | 9.16          | 0.86     |
| P04_post  | 29504724 | 27786     | 43.19              | 4.4              | 12.1          | 1.05        | 0.91      | 9.1           | 0.89     |
| P04_pre   | 13192764 | 14154     | 43.32              | 4.43             | 12.13         | 1.04        | 0.88      | 8.66          | 0.91     |
| P05_pre   | 3876491  | 6611      | 43.9               | 4.7              | 12.88         | 1.05        | 0.93      | 7.51          | 0.85     |
| P07_post  | 4285650  | 12290     | 43.26              | 4.27             | 12.07         | 1.05        | 0.91      | 8.07          | 0.86     |
| P07_pre   | 2935907  | 35249     | 43.52              | 4.35             | 12.2          | 1.05        | 0.98      | 8.94          | 0.85     |
| P08_post  | 2677615  | 10217     | 41.33              | 2.06             | 13.41         | 1.05        | 1         | 3.02          | 0.33     |
| P08_pre   | 4203001  | 2732      | 41.23              | 1.75             | 13.54         | 1.04        | 1         | 2.59          | 0.33     |
| P10_post  | 3721399  | 5642      | 43.53              | 4.38             | 12.44         | 1.04        | 0.93      | 7.35          | 0.85     |
| P10_pre   | 5251434  | 10593     | 43.56              | 4.7              | 12.7          | 1.03        | 0.92      | 7.99          | 0.86     |
| P11_post  | 5017370  | 2908      | 44.91              | 5.89             | 14.18         | 1.04        | 0.96      | 6.24          | 0.78     |
| P12_post  | 5454394  | 2336      | 45.21              | 3.57             | 13.39         | 1.04        | 1         | 4.42          | 0.57     |
| P14_post  | 5017370  | 2908      | 44.91              | 5.89             | 14.18         | 1.04        | 0.96      | 6.24          | 0.78     |
| P14_pre   | 5133738  | 2774      | 43.55              | 4.58             | 12.46         | 1.03        | 0.96      | 6.13          | 0.77     |
| P15_post  | 3554068  | 5912      | 43.45              | 4.44             | 12.22         | 1.04        | 0.96      | 6.77          | 0.78     |
| P15_pre   | 5780539  | 14423     | 43.81              | 4.39             | 12.68         | 1.05        | 0.92      | 8.33          | 0.87     |
| P16_post  | 2901936  | 194       | 42.87              | 4.09             | 11.58         | 1.03        | 0.94      | 3.9           | 0.74     |
| P16_pre   | 6553910  | 3707      | 42.75              | 3.72             | 10.6          | 1.04        | 0.99      | 5.4           | 0.66     |
| P18_post  | 2860836  | 1684      | 42.82              | 4.39             | 11.85         | 1.04        | 0.91      | 6.45          | 0.87     |
| P18_pre   | 3899503  | 10160     | 43.09              | 4.2              | 11.89         | 1.05        | 0.88      | 8.35          | 0.9      |
| P19_post  | 2878119  | 14518     | 42.55              | 3.99             | 12.03         | 1.04        | 0.92      | 8.28          | 0.86     |
| P19_pre   | 3749427  | 4746      | 42.65              | 4                | 12.11         | 1.04        | 0.94      | 6.86          | 0.81     |
| P20_post  | 2531512  | 3563      | 43.14              | 4.56             | 12.25         | 1.04        | 0.91      | 7.16          | 0.88     |
| P21_pre   | 2335313  | 4977      | 43.16              | 4.55             | 12.39         | 1.04        | 0.88      | 7.67          | 0.9      |

**Supplementary Table 3.** Predictive values of putative biomarkers.

|                        | MPR (n = 5)   |          | nMPR (n = 14) |          | P-value | PPR+          |          | nPPR+         |          | P-value |
|------------------------|---------------|----------|---------------|----------|---------|---------------|----------|---------------|----------|---------|
|                        | PDL1 $\geq$ 1 | PDL1<1   | PDL1 $\geq$ 1 | PDL1<1   |         | PDL1 $\geq$ 1 | PDL1<1   | PDL1 $\geq$ 1 | PDL1<1   |         |
| PD-L1                  | 3             | 2        | 0             | 13       | 0.0103  | 3             | 5        | 0             | 10       | 0.0686  |
| MSI                    | MSI-H         | MSS      | MSI-H         | MSS      | 0.0088  | MSI-H         | MSS      | MSI-H         | MSS      | 0.0578  |
|                        | 3             | 2        | 0             | 14       |         | 3             | 5        | 0             | 11       |         |
| TMB                    | TMB-H         | TMB-L    | TMB-H         | TMB-L    | 0.0049  | TMB-H         | TMB-L    | TMB-H         | TMB-L    | 0.0048  |
|                        | 4             | 1        | 1             | 13       |         | 5             | 3        | 0             | 11       |         |
| TNB                    | TNB-H         | TNB-L    | TNB-H         | TNB-L    | 0.0088  | TNB-H         | TNB-L    | TNB-H         | TNB-L    | 0.0578  |
|                        | 3             | 2        | 0             | 14       |         | 3             | 5        | 0             | 11       |         |
| RREB1 mutation         | RREB1-mt      | RREB1-wt | RREB1-mt      | RREB1-wt | 0.001   | RREB1-mt      | RREB1-wt | RREB1-mt      | RREB1-wt | 0.0181  |
|                        | 4             | 1        | 0             | 14       |         | 4             | 4        | 0             | 11       |         |
| SSPO mutation          | SSPO-mt       | SSPO-wt  | SSPO-mt       | SSPO-wt  | 0.0049  | SSPO-mt       | SSPO-wt  | SSPO-mt       | SSPO-wt  | 0.1108  |
|                        | 4             | 1        | 1             | 13       |         | 4             | 4        | 1             | 10       |         |
| PD-L1 + RREB1 mutation | Positive      | Negative | Positive      | Negative | <0.0001 | Positive      | Negative | Positive      | Negative | 0.0065  |
|                        | 5             | 0        | 0             | 14       |         | 5             | 3        | 0             | 10       |         |

TMB-H is defined as TMB > 10; TNB-H is defined as TNB > 7; P-values are calculated by Fisher's exact tests.
