# Supplementary material for: Neoadjuvant therapy with immune checkpoint blockade, antiangiogenesis, and chemotherapy for locally advanced gastric cancer
Source: PubMed Central journal article supplement (PMC9810618; doi:10.1038/s41467-022-35431-x), 2023-01-03
Supplement: 41467_2022_35431_MOESM3_ESM.pdf [file 41467_2022_35431_MOESM3_ESM.pdf]

**Title:** Supplementary Data 1:

**Description:** Somatic mutations.

**Title:** Supplementary Data 2:

**Description:** Gene mutation frequencies in MPR and non-MPR groups.

**Title:** Supplementary Data 3:

**Description:** Quality control of Whole-exome sequencing data.
